# Supplementary material for: Dioxole functionalized metal–organic frameworks
Source: Royal Society of Chemistry journal article supplement (doi:10.1039/c3dt32588a), 2013-01-01
Supplement: c3dt32588a.pdf [file c3dt32588a.pdf]

# Dioxole Functionalized Metal-Organic Frameworks

Phuong V. Dau, Luis R. Polanco and Seth M. Cohen\*

*Department of Chemistry and Biochemistry, University of California, San Diego, La Jolla, CA,  
United States, 92093*

## SUPPORTING INFORMATION

\* To whom correspondence should be addressed. E-mail: scohen@ucsd.edu. Telephone: (858) 822-5596.

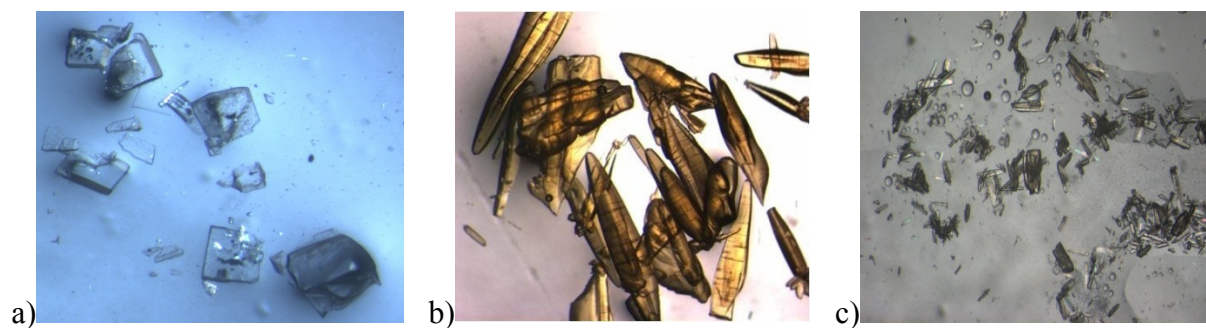

**Figure S1.** Pictures of IRMOF-1-dioxole (a), MOF-1-dioxole (b), and BMOF-2-dioxole (c).

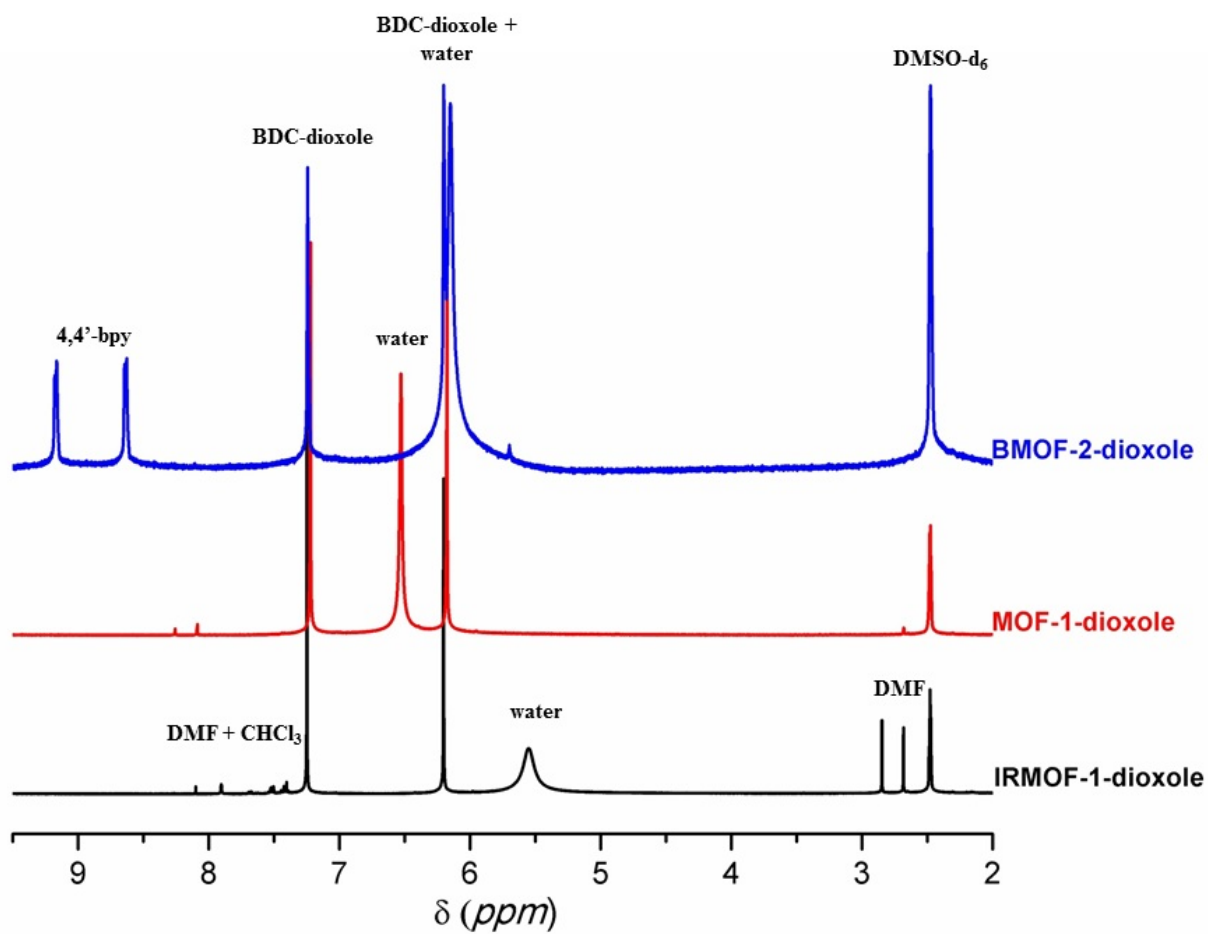

**Figure S2.** <sup>1</sup>H NMR after digestion of IRMOF-1-dioxole, MOF-1-dioxole, and BMOF-2-dioxole.

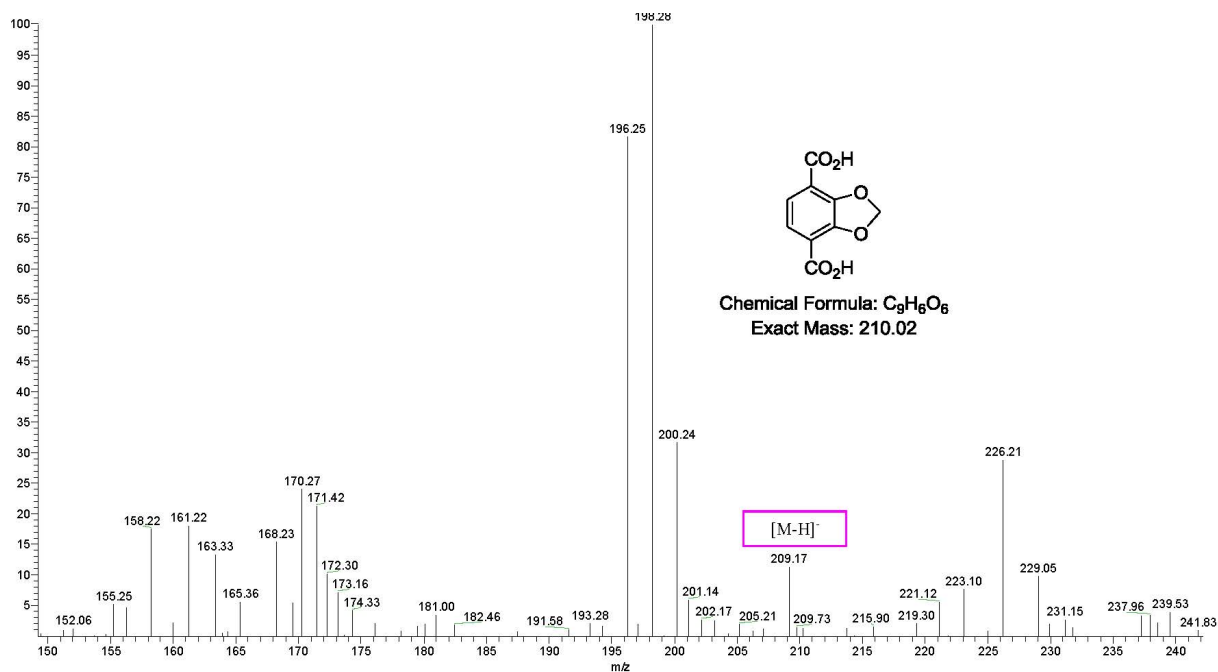

Figure S3. ESI-MS of digested IRMOF-1-dioxole.

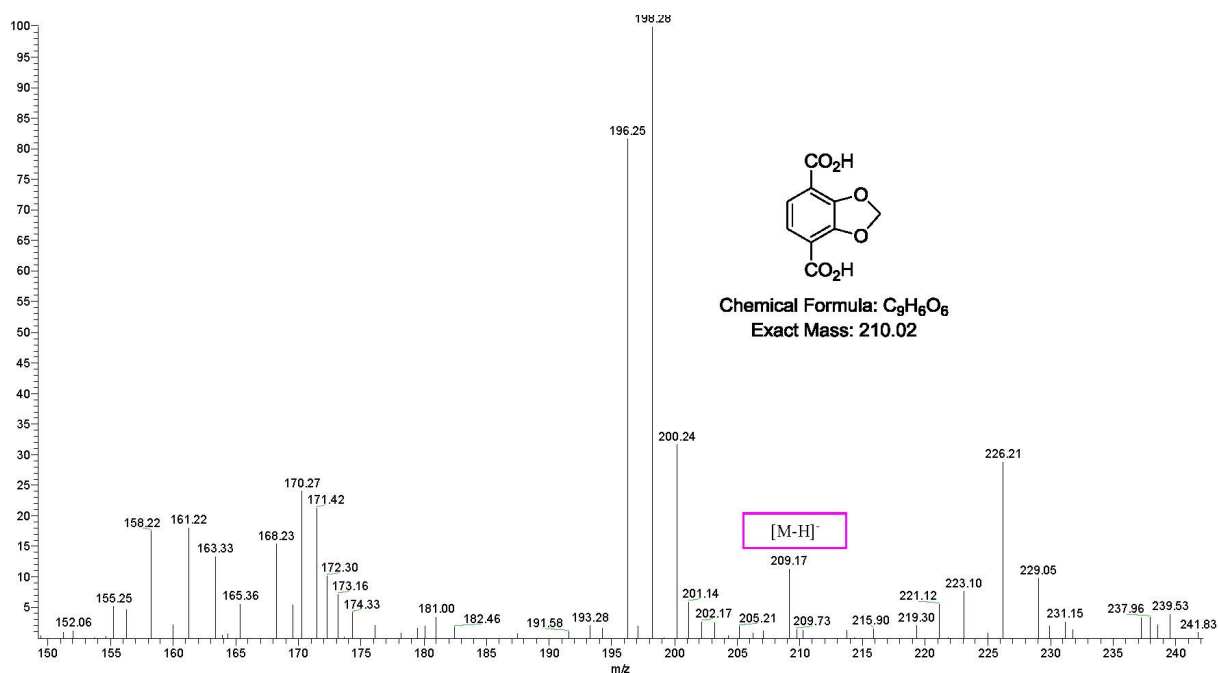

Figure S4. ESI-MS of digested MOF-1-dioxole.

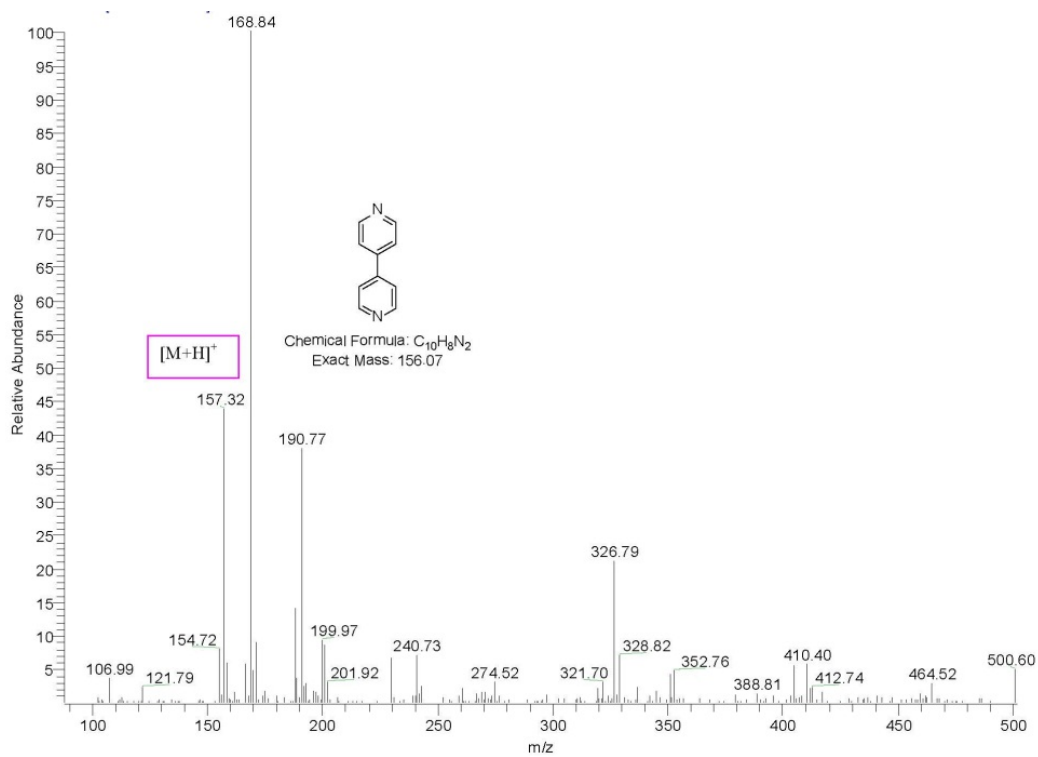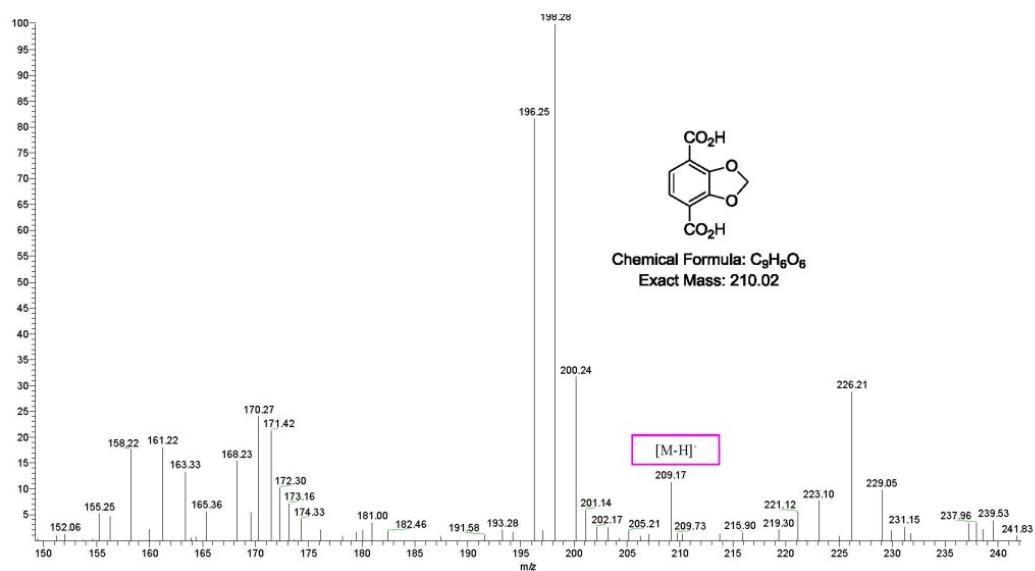

Figure S5. ESI-MS of digested BMOF-2-dioxole.

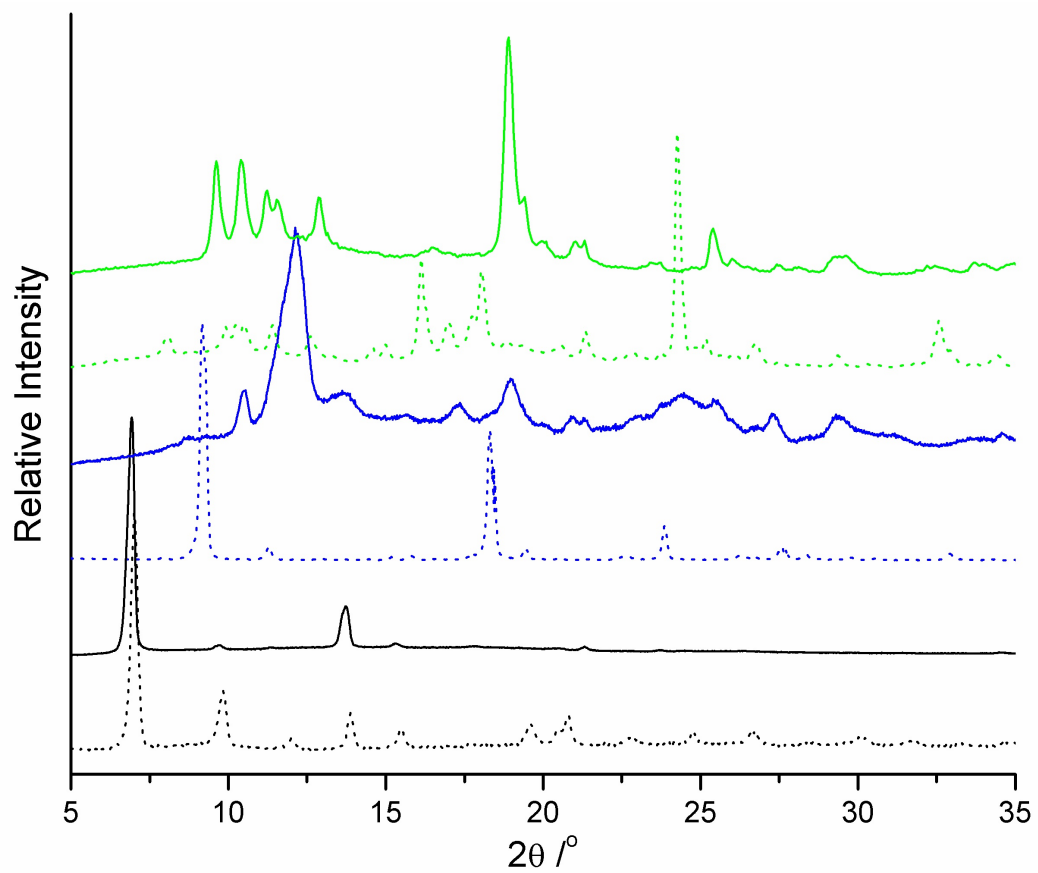

**Figure S6.** PXRD of the dioxole-functionalized MOFs prior to (dotted lines) and after (solid lines) activation. IRMOF-1-dioxole (black), MOF-1-dioxole (blue), and BMOF-2-dioxole (green).

**Table S1.** Summary of BET surface areas measurements of MOFs.

| <b>MOFs</b>            | <b>BET 1 (m<sup>2</sup>/g)</b> | <b>BET 1 (m<sup>2</sup>/g)</b> | <b>BET 1 (m<sup>2</sup>/g)</b> | <b>Average ± Std<br/>(m<sup>2</sup>/g)</b> |
|------------------------|--------------------------------|--------------------------------|--------------------------------|--------------------------------------------|
| <b>IRMOF-1-dioxole</b> | 2564                           | 2565                           | 2420                           | 2516 ± 83                                  |
| <b>MOF-1-dioxole</b>   | 437                            | 393                            | 454                            | 428 ± 31                                   |
| <b>BMOF-2-dioxole</b>  | 3                              | 5                              | 7                              | 5 ± 2                                      |

**Table S2.** Summary of calculated void volume per unit cell, and the percentage of void volume per unit cell of each framework.

| <b>MOF</b>      | <b>Void Volume per<br/>unit cell (Å<sup>3</sup>)<sup>1</sup></b> | <b>Percentage of void volume<br/>per unit cell (%)</b> |
|-----------------|------------------------------------------------------------------|--------------------------------------------------------|
| IRMOF-1-dioxole | 11938                                                            | ~69                                                    |
| MOF-1-dioxole   | 2228                                                             | ~42                                                    |
| BMOF-2-dioxole  | 465 <sup>2</sup>                                                 | ~28                                                    |

<sup>1</sup> The void volume was calculated by using PLATON.<sup>1</sup>

<sup>2</sup> The *N,N*-dimethylformamide molecule was removed before the estimation of void volume.

**Table S3.** Crystallographic data for IRMOF-1-dioxole.

|                                      |                                                                             |
|--------------------------------------|-----------------------------------------------------------------------------|
| Identification code                  | IRMOF-1-dioxole                                                             |
| Empirical formula                    | C <sub>27</sub> H <sub>12</sub> O <sub>19</sub> Zn <sub>4</sub>             |
| Formula weight                       | 949.72                                                                      |
| Temperature                          | 250(2) K                                                                    |
| Wavelength                           | 1.54178 Å                                                                   |
| Crystal system                       | Cubic                                                                       |
| Space group                          | <i>Fm-3m</i>                                                                |
| Unit cell dimensions                 | $a = b = c = 25.896(3) \text{ \AA}$<br>$\alpha = \beta = \gamma = 90^\circ$ |
| Volume                               | 17367(3) Å <sup>3</sup>                                                     |
| Z                                    | 8                                                                           |
| Density (calculated)                 | 0.726 mg/m <sup>3</sup>                                                     |
| Absorption coefficient               | 1.608 mm <sup>-1</sup>                                                      |
| F(000)                               | 3712                                                                        |
| Crystal size                         | 0.15 x 0.10 x 0.10 mm <sup>3</sup>                                          |
| Theta range for data collection      | 2.96 to 42.55°.                                                             |
| Index ranges                         | -19<=h<=15, -12<=k<=21, -17<=l<=19                                          |
| Reflections collected                | 4602                                                                        |
| Independent reflections              | 312 [ $R_{int} = 0.0421$ ]                                                  |
| Completeness to theta = 42.55°       | 85.7 %                                                                      |
| Data / restraints / parameters       | 312 / 0 / 29                                                                |
| Goodness-of-fit on F <sup>2</sup>    | 1.218                                                                       |
| Final R indices [ $I > 2\sigma(I)$ ] | $R_1 = 0.0481$ , $wR_2 = 0.1577$                                            |
| R indices (all data)                 | $R_1 = 0.0537$ , $wR_2 = 0.1543$                                            |
| Largest diff. peak and hole          | 0.290 and -0.194 e.Å <sup>-3</sup>                                          |

**Table S4.** Crystallographic data for MOF-1-dioxole.

|                                              |                                                                                                          |
|----------------------------------------------|----------------------------------------------------------------------------------------------------------|
| Identification code                          | MOF-1-dioxole                                                                                            |
| Empirical formula                            | C <sub>18</sub> H <sub>8</sub> O <sub>12</sub> Zn <sub>2</sub>                                           |
| Formula weight                               | 546.98                                                                                                   |
| Temperature                                  | 200(2) K                                                                                                 |
| Wavelength                                   | 0.71073 Å                                                                                                |
| Crystal system                               | Tetragonal                                                                                               |
| Space group                                  | <i>P</i> 4 <sub>1</sub> 2 <sub>1</sub> 2                                                                 |
| Unit cell dimensions                         | <i>a</i> = <i>b</i> = 19.5078(11) Å<br><i>c</i> = 13.8150(8) Å<br>$\alpha = \beta = \gamma = 90^\circ$ . |
| Volume                                       | 5257.4(5) Å <sup>3</sup>                                                                                 |
| Z                                            | 8                                                                                                        |
| Density (calculated)                         | 1.382 mg/m <sup>3</sup>                                                                                  |
| Absorption coefficient                       | 1.875 mm <sup>-1</sup>                                                                                   |
| F(000)                                       | 2176                                                                                                     |
| Crystal size                                 | 0.50 x 0.30 x 0.25 mm <sup>3</sup>                                                                       |
| Theta range for data collection              | 1.48 to 28.27°.                                                                                          |
| Index ranges                                 | -17 ≤ <i>h</i> ≤ 18, 0 ≤ <i>k</i> ≤ 25, 0 ≤ <i>l</i> ≤ 18                                                |
| Reflections collected                        | 6219                                                                                                     |
| Independent reflections                      | 6219 [ <i>R</i> <sub>(int)</sub> = 0.0000]                                                               |
| Completeness to theta = 28.27°               | 97.1 %                                                                                                   |
| Max. and min. transmission                   | 0.6514 and 0.4541                                                                                        |
| Data / restraints / parameters               | 6219 / 0 / 271                                                                                           |
| Goodness-of-fit on F <sup>2</sup>            | 1.065                                                                                                    |
| Final R indices [ <i>I</i> > 2σ( <i>I</i> )] | <i>R</i> <sub>1</sub> = 0.0466, <i>wR</i> <sub>2</sub> = 0.1198                                          |
| R indices (all data)                         | <i>R</i> <sub>1</sub> = 0.0533, <i>wR</i> <sub>2</sub> = 0.1169                                          |
| Absolute structure parameter                 | 0.020(2)                                                                                                 |
| Largest diff. peak and hole                  | 1.307 and -0.832 e.Å <sup>-3</sup>                                                                       |



**Table S5.** Crystallographic data for BMOF-2-dioxole.

|                                      |                                                                                                                                                                              |
|--------------------------------------|------------------------------------------------------------------------------------------------------------------------------------------------------------------------------|
| Identification code                  | BMOF-2-dioxole                                                                                                                                                               |
| Empirical formula                    | C <sub>31</sub> H <sub>23</sub> N <sub>3</sub> O <sub>13</sub> Zn <sub>2</sub>                                                                                               |
| Formula weight                       | 776.26                                                                                                                                                                       |
| Temperature                          | 250(2) K                                                                                                                                                                     |
| Wavelength                           | 0.71073 Å                                                                                                                                                                    |
| Crystal system                       | Triclinic                                                                                                                                                                    |
| Space group                          | <i>P</i> -1                                                                                                                                                                  |
| Unit cell dimensions                 | $a = 10.8947(6) \text{ \AA}$ $\alpha = 81.540(2)^\circ$<br>$b = 10.9708(6) \text{ \AA}$ $\beta = 89.016(2)^\circ$<br>$c = 13.9891(7) \text{ \AA}$ $\gamma = 87.658(2)^\circ$ |
| Volume                               | 1652.35(15) Å <sup>3</sup>                                                                                                                                                   |
| Z                                    | 2                                                                                                                                                                            |
| Density (calculated)                 | 1.560 mg/m <sup>3</sup>                                                                                                                                                      |
| Absorption coefficient               | 1.522 mm <sup>-1</sup>                                                                                                                                                       |
| F(000)                               | 788                                                                                                                                                                          |
| Crystal size                         | 0.25 x 0.15 x 0.10 mm <sup>3</sup>                                                                                                                                           |
| Theta range for data collection      | 2.37 to 25.34°                                                                                                                                                               |
| Index ranges                         | -13 ≤ h ≤ 13, -12 ≤ k ≤ 13, -16 ≤ l ≤ 16                                                                                                                                     |
| Reflections collected                | 14015                                                                                                                                                                        |
| Independent reflections              | 5482 [ $R_{(int)} = 0.0735$ ]                                                                                                                                                |
| Completeness to theta = 25.34°       | 90.7 %                                                                                                                                                                       |
| Max. and min. transmission           | 0.9872 and 0.8742                                                                                                                                                            |
| Data / restraints / parameters       | 5482 / 0 / 442                                                                                                                                                               |
| Goodness-of-fit on F <sup>2</sup>    | 1.076                                                                                                                                                                        |
| Final R indices [ $I > 2\sigma(I)$ ] | $R_1 = 0.0632$ , $wR_2 = 0.1635$                                                                                                                                             |
| R indices (all data)                 | $R_1 = 0.1103$ , $wR_2 = 0.1498$                                                                                                                                             |
| Largest diff. peak and hole          | 1.125 and -0.768 e.Å <sup>-3</sup>                                                                                                                                           |

## Reference.

1. A. L. Spek, *Acta Cryst.*, 2009, **D65**, 148-155.
